# Supplementary material for: Estimating the Trade-Offs between Wildfires and Carbon Stocks across Landscape Types to Inform Nature-Based Solutions in Mediterranean Regions
Source: Preprints.org preprint supplement (doi:10.20944/preprints202308.1776.v1), 2023-08-25
Supplement: Supplementary file 3 [file supplementary]

Supplementary material -on “Estimating the trade-offs between wildfires and carbon stocks across landscape types to inform NBS in Mediterranean regions”.


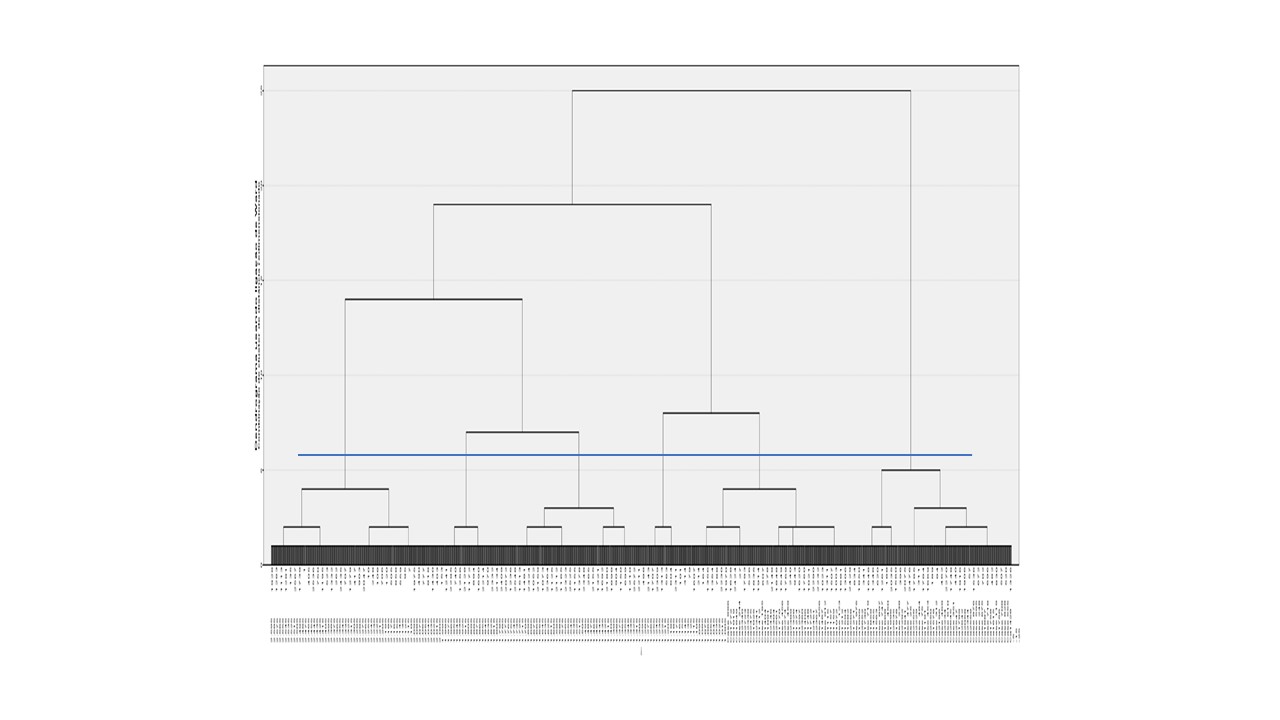


**Figure S1**. Dendrogram of hierarchical cluster analysis. Cutt-off done at 6 clusters.

**Table S1**-Results of multiple logistic regression analysis for the most hazardous fire and LULC model

| Variable | Beta | p |
| --- | --- | --- |
|
| (Intercept) | 1,54 | 0,000 |
| FAR % | -0,07 | 0,000 |
| AGF % | -0,06 | 0,000 |
| FOR % | -0,04 | 0,000 |
| SHR % | -0,01 | 0,000 |

**Table S2** - Results of multiple linear regression analysis (dependent variable: CS) with simultaneous entry

| Variable | **Beta** | **p** |
| --- | --- | --- |
|
| (Intercept) | 26,09 | 0,000 |
| FAR % | -0,22 | 0,000 |
| AGF % | -0,11 | 0,000 |
| FOR % | -0,02 | 0,000 |
| SHR % | -0,15 | 0,000 |

Note: [F (4,2761) =1251,644 ;p<0,001;R2=0,645]
